# Supplementary material for: In vitro characteristics of Lactobacillus spp. strains isolated from the chicken digestive tract and their role in the inhibition of Campylobacter colonization
Source: PubMed Central journal article supplement (PMC5635155; doi:10.1002/mbo3.512), 2017-07-24

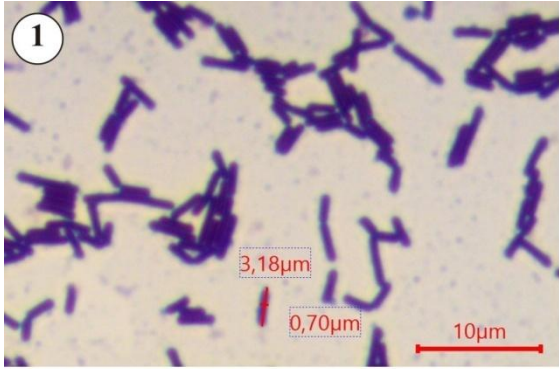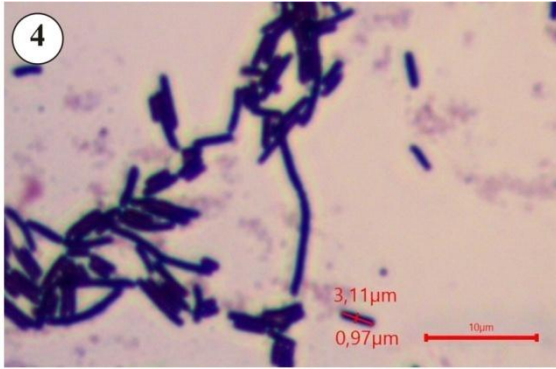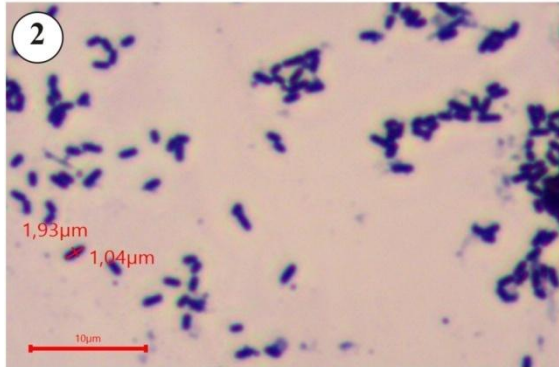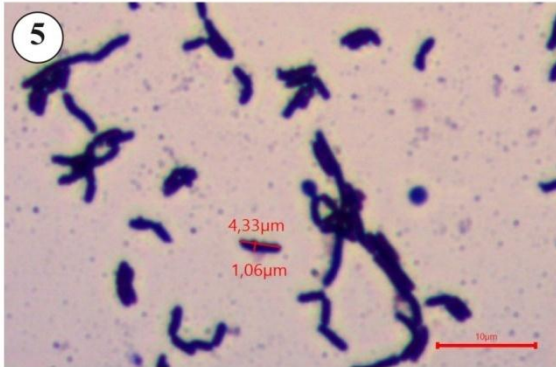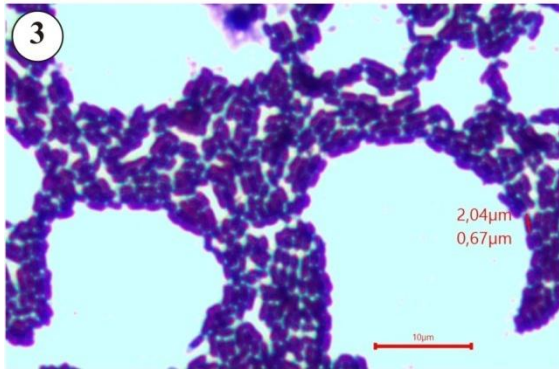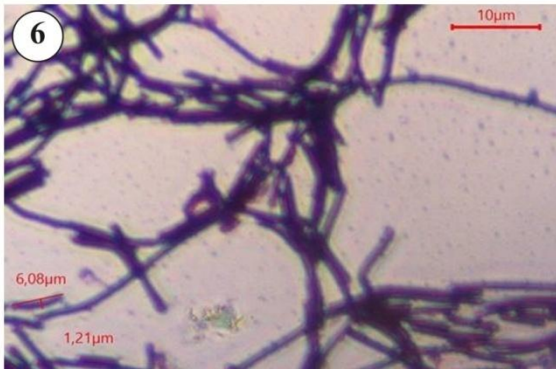

Supplement: MBO3-6-na-s001.pdf [file MBO3-6-na-s001.pdf]
